# Supplementary material
Source: PubMed Central journal article supplement (PMC4426802)
Supplement: mt2014180x1.pdf [file mt2014180x1.pdf]

## **Supplemental Figure legends.**

### **Supplementary Figure 1**

EGFP immunostaining (presented as % area) of each cohort was quantified by averaging the positive pixel count output (Aperio) from three slides spaced 25 mm apart, each containing two consecutive sections. The dotted line represents the background staining levels stained at the same time. 1-way Anova with Dunnett's test for multiple comparison. N=3 mice/cohort; \*\*\*\*p<0.0001; \*\*\*p<0.001; \*p<0.05

**Supplemental Figure 2.** Cellular tropism in the spinal cord following ICM delivery of rAAVs in neonatal mice. Representative tricolor merged fluorescent photomicrograph from 3-week-old mice spinal cord sections were generated following co-labeling with anti EGFP antibody (488nm - green), DAPI (350nm - blue) and cell type specific marker antibodies (568nm - red) for neurons (NeuN), motor neurons (ChAT) and astrocytes (GFAP). Magnification, 400x.

**Supplemental Figure 3.** Cellular tropism in the spinal cord following IM delivery of rAAVs in neonatal mice. Representative tricolor merged fluorescent photomicrograph from 3-week-old mice spinal cord sections were generated following co-labeling with anti EGFP antibody (488nm - green), DAPI (350nm - blue) and cell type specific marker antibodies (568nm - red) for neurons (NeuN), motor neurons (ChAT) and astrocytes (GFAP). Magnification, 400x.

**Supplemental Figure 4.** EGFP expression in mice brains injected IS with rAAV-EGFP on neonatal day P0. Representative sections from 3 week old mice show EGFP staining in different areas of the brain. Olf, olfactory bulb, hip, hippocampus, thal, thalamus, cereb, cerebellum, brainst, brain stem. For cortical distribution, please see Figure 4. Scale bar, top panel, 2mm; others, 500µm. n=3-4/group.

**Supplemental Figure 5.** EGFP expression in mice brains injected ICM with rAAV-EGFP on neonatal day P0. Representative sections from 3 week old mice show EGFP staining in different areas of the brain. Olf, olfactory bulb, hip, hippocampus, thal, thalamus, cereb, cerebellum, brainst, brain stem. For cortical distribution, please see Figure 4. Scale bar, top panel, 2mm; others, 500 $\mu$ m. n=3-4/group.

**Supplemental Figure 6.** EGFP expression in in mice brains injected with rAAV-EGFP in gastrocnemius muscle on neonatal day P0. Representative sections from 3 week old mice show EGFP staining in different areas of the brain. No expression was observed in any brain structure following IM injection of rAAV2/1 or 2/5 (data not shown), whereas 2/8 and 2/9 widespread but weak EGFP immunostaining. Olf, olfactory bulb, hip, hippocampus, thal, thalamus, cereb, cerebellum, brainst, brain stem. For cortical distribution, please see Figure 4. Scale bar, top panel, 2mm; others, 500 $\mu$ m. n=3-4/group.

**Supplemental Figure 7.** EGFP expression in the DRG of mice injected with different rAAV serotypes via IM, ICM or IS routes on neonatal day P0. Representative DRGs from the lumbar spinal cord (IS and IM) or cervical spinal cord (ICM) are depicted following EGFP immunostaining. Scale bar, 120 $\mu$ m. n=3-4/group.



**Supplemental Table 1.** Overall tissue biodistribution properties of different rAAV serotypes delivered via IS, ICM or IM routes. The semiquantitative assessment was performed by two independent blinded observers. +/-, rare, ND, not done.

|                    | rAAV1 |     |     | rAAV5 |     |     | rAAV8 |     |     | rAAV9 |     |     |
|--------------------|-------|-----|-----|-------|-----|-----|-------|-----|-----|-------|-----|-----|
|                    | IS    | ICM | IM  |
| <b>Brain</b>       | +     | ++  | -   | ++    | +   | -   | ++    | +++ | +   | ++    | +++ | +   |
| <b>Spinal Cord</b> | +++   | +   | +/- | +     | +   | +/- | ++    | ++  | +   | +++   | ++  | +   |
| <b>Muscle</b>      | ND    | ND  | +++ |

**Supplemental Table 2.** Quantitative nCounter expression profiling of inflammatory mediators from spinal cords of SOD1G93A and nontransgenic mice. A. Analysis of normalized data from Nanostring Inflammation GX array is presented from SOD1G93A mice injected with IL-10 (Tg+IL10), control SOD1G93A injected with EGFP or left uninjected (Tg+EGFP; Naïve Tg) and naïve nontransgenic mice (naïve NTg). B. Further analysis depicts genes that are increased or decreased following IL-10 expression, with p values generated from 2-tailed t test. C. The fold change data obtained in B was further analyzed using a false discovery rate of 0.1%, with a p value of <0.05.

Supplemental Table 2B

**Genes that IL-10 treatment decreases in SOD1G93A mice**

| Description | Fold change IL0 TG vs Control TG | p value    | Fold change Control TG vs Control NTG | p value    |
|-------------|----------------------------------|------------|---------------------------------------|------------|
| Ccl3        | 0.421126891                      | 0.00596471 | 24.31828442                           | 0.10301457 |
| Cxcl10      | 1.160729455                      | 0.91599879 | 13.08696432                           | 0.0181666  |
| C3ar1       | 1.274536578                      | 0.00058935 | 12.55446257                           | 0.15606918 |
| Ccl4        | 0.581682489                      | 0.11508226 | 12.55145249                           | 0.18290165 |
| Ccl11       | 0.21407287                       | 0.52163025 | 12.17312448                           | 0.61306914 |
| Ccl2        | 1.715844833                      | 0.19991044 | 11.00290135                           | 0.17083969 |
| Itgb2       | 0.947859434                      | 0.74393547 | 10.59543247                           | 0.14690729 |
| Hspb1       | 0.823863478                      | 0.17551381 | 9.545562092                           | 0.22540143 |
| C1qa        | 1.511316343                      | 0.00727702 | 9.215329038                           | 0.06234962 |
| Maff        | 0.846127485                      | 0.41972122 | 9.092521572                           | 0.13136971 |
| Tlr1        | 0.930900045                      | 0.59492979 | 8.892851246                           | 0.11165838 |
| C1qb        | 1.269523177                      | 0.06591179 | 8.249667529                           | 0.0766675  |
| C1r         | 1.526296688                      | 0.03318592 | 6.613754957                           | 0.04749811 |
| Cfb         | 1.213633313                      | 0.0384967  | 5.764882871                           | 0.0898619  |
| Tlr7        | 1.155851016                      | 0.41470923 | 5.578082879                           | 0.09198212 |
| Tlr2        | 0.740954832                      | 0.15222581 | 5.514430836                           | 0.03689271 |
| Il1b        | 0.719393879                      | 0.98478855 | 5.011528822                           | 0.25139401 |
| Il1a        | 0.793043894                      | 0.72669839 | 4.759231158                           | 0.21475602 |
| Gusb        | 0.887737082                      | 0.41640576 | 4.638010255                           | 0.06053595 |
| C3          | 0.935802728                      | 0.6041558  | 4.573895114                           | 0.1190215  |
| C1s         | 1.68734834                       | 0.00869714 | 3.979353117                           | 0.01954575 |
| Ccr1        | 1.498988342                      | 0.26894353 | 3.848350019                           | 0.06047705 |
| Tlr6        | 1.047041505                      | 0.48779054 | 3.608932769                           | 0.11161329 |
| Tgfb1       | 0.845170627                      | 0.22275996 | 3.59686583                            | 0.05515361 |
| C4a         | 1.643681181                      | 0.01049309 | 3.442837394                           | 0.10517196 |
| Tlr4        | 1.225996136                      | 0.00443972 | 3.318329107                           | 0.02645733 |
| Myc         | 0.975724425                      | 0.96537266 | 3.282266157                           | 0.03632734 |
| Cxcr4       | 1.456248034                      | 0.10316781 | 3.101468019                           | 0.02317108 |
| Il8rb       | 0.660234229                      | 0.46440186 | 3.097279472                           | 0.41931926 |
| Ccl7        | 1.206685001                      | 0.4249862  | 3.095612312                           | 0.31639558 |
| Cxcl1       | 1.106826292                      | 0.34576055 | 2.957780048                           | 0.0544806  |
| Il1r1       | 0.882485181                      | 0.94934957 | 2.883635425                           | 0.05053341 |
| Cebpb       | 1.259709414                      | 0.11207092 | 2.808266682                           | 0.01262807 |
| Fos         | 1.162153209                      | 0.72370784 | 2.760775074                           | 0.27796064 |
| Tgfb1       | 0.709774119                      | 0.33730007 | 2.32838412                            | 0.01759894 |
| Cfl1        | 0.704897791                      | 0.15807657 | 2.242769231                           | 0.0565902  |
| Il6ra       | 0.842685149                      | 0.2834392  | 2.165718336                           | 0.13630357 |
| Mafk        | 1.059895923                      | 0.86147395 | 2.116947545                           | 0.14684997 |
| Il1rn       | 0.703883495                      | 0.25488226 | 1.880982368                           | 0.00214349 |
| Myl2        | 0.339570946                      | 0.28902359 | 1.833867864                           | 0.5065991  |

**Genes that IL-10 treatment increases in SOD1G93A mice**

| Description | Fold change IL0 TG vs Control TG | p value    | Fold change Control TG vs Control NTG | p value    |
|-------------|----------------------------------|------------|---------------------------------------|------------|
| Ccl8        | 19.40885209                      | 0.02972633 | 5.864612512                           | 0.75921918 |
| Stat1       | 2.304784707                      | 0.05713076 | 1.061142805                           | 0.11673392 |
| Cd40        | 2.476083539                      | 0.0696555  | 0.791644444                           | 0.83508739 |
| Prkcb1      | 1.321595128                      | 0.06836651 | 0.637298981                           | 0.10979231 |
| Rps6ka5     | 1.210672617                      | 0.26169641 | 0.572258714                           | 0.06060502 |
| Elk1        | 1.12930946                       | 0.11671736 | 0.540813495                           | 0.1412591  |
| Atf2        | 1.212553721                      | 0.3308764  | 0.536494371                           | 0.09178314 |
| Mapk8       | 1.116309475                      | 0.09336257 | 0.536215853                           | 0.0219184  |
| Creb1       | 1.408791556                      | 0.10548281 | 0.531057612                           | 0.18968553 |
| Rapgef2     | 1.192078797                      | 0.45578017 | 0.52187514                            | 0.14531727 |
| Map2k6      | 1.16698067                       | 0.57766876 | 0.520311336                           | 0.00286109 |
| Hprt1       | 1.102180382                      | 0.43403755 | 0.503276323                           | 0.03942366 |
| Limk1       | 1.134869445                      | 0.14840331 | 0.433174686                           | 0.06856671 |

Supplemental Table 2A

| Gene   | Treatment Groups |          |          |          |         |         |          |          |          |          |           |           |
|--------|------------------|----------|----------|----------|---------|---------|----------|----------|----------|----------|-----------|-----------|
|        | Tg+IL-10         | Tg+IL-10 | Tg+IL-10 | Tg+IL-10 | Tg+EGFP | Tg+EGFP | Tg+EGFP  | Tg+EGFP  | Naive Tg | Naive Tg | Naive NTg | Naive NTg |
| Atf2   | 1513.99          | 1501.75  | 1476.38  | 1624.68  | 1447.66 | 1287.55 | 1552.13  | 501.91   | 1248.51  | 1529.08  | 2350.07   | 2351.34   |
| Bcl6   | 86.12            | 102.21   | 95.89    | 82.31    | 91.8    | 73.86   | 94.71    | 73.65    | 81.86    | 94.95    | 83.01     | 72.2      |
| C1qa   | 8404.57          | 7055.68  | 8160.62  | 9020.49  | 6269.97 | 5621.9  | 5698.92  | 4650.86  | 5449.83  | 4705.47  | 516.78    | 655.07    |
| C1qb   | 13075.19         | 8670.46  | 9813.91  | 11439.19 | 9460.13 | 8583.1  | 8952.76  | 7531.39  | 8757.64  | 7519.98  | 784.53    | 1268.28   |
| C1r    | 204.13           | 119.9    | 164.5    | 156.31   | 95.33   | 193.05  | 81.18    | 90.02    | 80.99    | 93.16    | 15.2      | 16.74     |
| C1s    | 179.68           | 145.46   | 153.76   | 91.3     | 89.15   | 157.8   | 66.14    | 49.1     | 78.41    | 66.29    | 25.72     | 16.74     |
| C2     | 97.81            | 37.35    | 55.39    | 55.33    | 15.01   | 82.26   | 20.29    | 19.09    | 11.2     | 19.71    | 5.85      | 31.39     |
| C3     | 2680.32          | 6221.27  | 5072.28  | 3574.44  | 3529.12 | 2271.26 | 5815.42  | 10308.26 | 3276.79  | 2927.37  | 806.74    | 1243.17   |
| C3ar1  | 1113.17          | 786.26   | 935.76   | 873.55   | 832.41  | 861.16  | 626.11   | 632.84   | 867.66   | 544.63   | 57.29     | 58.6      |
| C4a    | 9694.23          | 11036.11 | 10546.31 | 11432.97 | 6393.55 | 5895.53 | 6493.4   | 9320.81  | 5289.57  | 5583.33  | 1148.14   | 2625.51   |
| C6     | 17.01            | 27.52    | 14.05    | 27.67    | 1.77    | 15.11   | 2.25     | 10.91    | 3.45     | 4.48     | 2.34      | 1.05      |
| C7     | 6.38             | 5.9      | 5.79     | 6.92     | 7.94    | 15.11   | 9.02     | 2.73     | 6.89     | 2.69     | 4.68      | 7.33      |
| C8a    | 7.44             | 4.91     | 5.79     | 3.46     | 0.88    | 3.36    | 6.01     | 8.18     | 4.31     | 1.79     | 5.85      | 3.14      |
| C8b    | 7.44             | 7.86     | 9.92     | 11.07    | 12.36   | 15.11   | 6.76     | 16.37    | 12.06    | 5.37     | 12.86     | 13.6      |
| C9     | 1.06             | 1.97     | 3.31     | 6.22     | 1.77    | 1.68    | 2.25     | 2.73     | 5.17     | 5.37     | 5.85      | 3.14      |
| Ccl11  | 18.07            | 25.55    | 9.92     | 9.68     | 13.24   | 329.02  | 50.36    | 21.82    | 25.85    | 2.69     | 5.85      | 6.28      |
| Ccl17  | 61.67            | 22.6     | 54.56    | 20.75    | 52.08   | 52.04   | 39.09    | 57.28    | 37.05    | 42.1     | 78.34     | 82.67     |
| Ccl19  | 58.48            | 69.78    | 19.84    | 45.65    | 21.19   | 40.29   | 39.84    | 35.46    | 24.13    | 24.19    | 25.72     | 20.93     |
| Ccl2   | 527.35           | 180.84   | 319.91   | 143.17   | 208.32  | 342.45  | 105.23   | 180.03   | 73.24    | 114.66   | 16.37     | 14.65     |
| Ccl21b | 82.93            | 90.42    | 30.59    | 87.15    | 52.96   | 124.22  | 93.95    | 160.94   | 41.36    | 146.91   | 65.47     | 80.58     |
| Ccl22  | 24.45            | 11.79    | 19.84    | 6.22     | 18.54   | 25.18   | 19.54    | 5.46     | 16.37    | 13.44    | 23.38     | 29.3      |
| Ccl24  | 11.7             | 6.88     | 4.13     | 4.84     | 12.36   | 4.89    | 6.01     | 13.64    | 8.62     | 15.23    | 17.54     | 12.56     |
| Ccl3   | 136.09           | 112.04   | 106.64   | 98.91    | 277.17  | 288.73  | 211.96   | 286.42   | 319.67   | 232      | 11.69     | 10.46     |
| Ccl4   | 79.74            | 46.19    | 37.2     | 34.58    | 82.09   | 60.43   | 61.63    | 133.66   | 112.01   | 60.02    | 9.35      | 4.19      |
| Ccl5   | 335.97           | 168.06   | 259.57   | 258.68   | 50.32   | 73.86   | 46.6     | 87.29    | 36.19    | 53.75    | 12.86     | 15.7      |
| Ccl7   | 37.21            | 25.55    | 34.72    | 16.6     | 22.07   | 35.25   | 15.03    | 32.73    | 22.4     | 14.33    | 5.85      | 9.42      |
| Ccl8   | 944.12           | 599.52   | 670.41   | 224.09   | 7.06    | 109.11  | 24.05    | 30.01    | 15.51    | 2.69     | 2.34      | 8.37      |
| Ccr1   | 24.45            | 14.74    | 52.08    | 12.45    | 22.95   | 31.89   | 8.27     | 10.91    | 17.23    | 12.54    | 5.85      | 3.14      |
| Ccr2   | 19.14            | 15.73    | 23.15    | 12.45    | 7.06    | 31.89   | 9.02     | 2.73     | 12.92    | 8.96     | 3.51      | 5.23      |
| Ccr3   | 4.25             | 4.91     | 4.96     | 5.53     | 2.65    | 1.68    | 4.51     | 2.73     | 6.89     | 1.79     | 3.51      | 4.19      |
| Ccr4   | 6.38             | 12.78    | 9.09     | 8.99     | 4.41    | 6.71    | 6.76     | 13.64    | 4.31     | 10.75    | 9.35      | 7.33      |
| Ccr7   | 1.06             | 7.86     | 2.48     | 1.38     | 2.65    | 3.36    | 5.26     | 2.73     | 1.72     | 4.48     | 4.68      | 4.19      |
| Cd4    | 14.88            | 21.62    | 19.01    | 19.37    | 6.18    | 23.5    | 6.76     | 19.09    | 4.31     | 5.37     | 5.85      | 5.23      |
| Cd40   | 58.48            | 36.36    | 83.49    | 42.19    | 21.19   | 30.22   | 17.29    | 16.37    | 18.96    | 29.56    | 37.41     | 18.84     |
| Cd40lg | 4.25             | 5.9      | 9.09     | 5.53     | 4.41    | 3.36    | 6.01     | 2.73     | 6.89     | 8.06     | 4.68      | 2.09      |
| Cd55   | 77.61            | 102.21   | 73.57    | 66.4     | 74.15   | 97.36   | 90.95    | 90.02    | 72.38    | 51.95    | 149.66    | 128.71    |
| Cdc42  | 8925.54          | 7899.93  | 8361.5   | 8023.83  | 8219.9  | 8188.61 | 8020.72  | 7337.71  | 7363.52  | 8249.13  | 8680.07   | 8544.16   |
| Cebpb  | 476.31           | 663.41   | 521.61   | 780.18   | 442.24  | 491.85  | 432.94   | 556.47   | 492.85   | 490.88   | 167.19    | 177.89    |
| Cfb    | 110.57           | 107.13   | 100.85   | 115.51   | 93.57   | 77.22   | 84.94    | 106.38   | 98.23    | 76.14    | 16.37     | 14.65     |
| Cfd    | 4.25             | 11.79    | 7.44     | 4.15     | 5.3     | 92.33   | 4.51     | 2.73     | 22.4     | 4.48     | 5.85      | 3.14      |
| Cfl1   | 18.07            | 11.79    | 35.55    | 37.35    | 27.36   | 33.57   | 31.57    | 60.01    | 25.85    | 40.31    | 10.52     | 21.98     |
| Cltc   | 9593.22          | 10563.38 | 10555.41 | 10420.39 | 9614.6  | 9625.56 | 10495.12 | 7984.2   | 8692.16  | 10319.25 | 16139.5   | 16261.63  |
| Creb1  | 51.03            | 46.19    | 57.04    | 53.95    | 37.07   | 28.54   | 53.37    | 24.55    | 39.64    | 38.52    | 79.5      | 59.65     |
| Crp    | 7.44             | 1.97     | 1.65     | 6.22     | 2.65    | 6.71    | 6.01     | 2.73     | 4.31     | 0.9      | 4.68      | 11.51     |
| Csf1   | 1069.58          | 1079.14  | 1246.58  | 1057.53  | 1239.34 | 1039.1  | 1122.19  | 1257.5   | 967.61   | 1151.96  | 660.59    | 633.09    |
| Csf2   | 7.44             | 5.9      | 4.13     | 5.53     | 7.94    | 13.43   | 6.01     | 5.46     | 5.17     | 2.69     | 4.68      | 4.19      |
| Csf3   | 5.32             | 8.85     | 1.65     | 9.68     | 4.41    | 1.68    | 5.26     | 2.73     | 8.62     | 3.58     | 15.2      | 2.09      |
| Cxcl1  | 25.52            | 12.78    | 18.19    | 7.61     | 23.83   | 18.47   | 18.79    | 8.18     | 7.75     | 9.85     | 3.51      | 6.28      |
| Cxcl10 | 564.56           | 178.87   | 225.67   | 160.46   | 255.99  | 176.26  | 95.46    | 750.14   | 89.61    | 92.26    | 15.2      | 21.98     |
| Cxcl2  | 4.25             | 2.95     | 1.65     | 2.07     | 7.94    | 3.36    | 2.25     | 2.73     | 4.31     | 4.48     | 8.18      | 4.19      |
| Cxcl3  | 3.19             | 5.9      | 2.48     | 4.15     | 1.77    | 1.68    | 6.76     | 2.73     | 4.31     | 1.79     | 3.51      | 2.09      |
| Cxcl5  | 5.32             | 6.88     | 18.19    | 6.92     | 3.53    | 36.93   | 8.27     | 10.91    | 6.03     | 8.06     | 18.71     | 4.19      |
| Cxcl9  | 132.9            | 36.36    | 76.05    | 53.95    | 7.94    | 6.71    | 5.26     | 79.11    | 8.62     | 5.37     | 2.34      | 10.46     |
| Cxcr4  | 383.81           | 234.89   | 424.07   | 284.27   | 232.16  | 310.56  | 165.36   | 240.04   | 214.55   | 204.24   | 73.66     | 73.25     |

|         |          |          |          |         |          |          |          |          |          |          |          |          |
|---------|----------|----------|----------|---------|----------|----------|----------|----------|----------|----------|----------|----------|
| Daxx    | 49.97    | 54.06    | 54.56    | 51.18   | 45.9     | 48.68    | 37.58    | 81.83    | 46.53    | 43.89    | 53.78    | 47.09    |
| Ddit3   | 917.54   | 769.55   | 984.53   | 773.96  | 860.65   | 893.06   | 788.47   | 954.72   | 928.84   | 766.78   | 480.54   | 529.5    |
| Elk1    | 36.15    | 34.4     | 38.85    | 37.35   | 35.31    | 36.93    | 30.82    | 35.46    | 23.26    | 33.14    | 47.94    | 72.2     |
| Fasl    | 6.38     | 9.83     | 3.31     | 6.22    | 6.18     | 8.39     | 9.02     | 2.73     | 2.58     | 3.58     | 8.18     | 2.09     |
| Fos     | 888.83   | 327.28   | 390.18   | 381.79  | 328.37   | 517.03   | 473.53   | 649.21   | 351.55   | 246.34   | 140.3    | 169.52   |
| Fxyd2   | 25.52    | 25.55    | 27.28    | 14.52   | 43.25    | 55.4     | 34.58    | 32.73    | 24.13    | 34.04    | 45.6     | 19.88    |
| Gapdh   | 11553.76 | 10666.57 | 10669.48 | 10751   | 10375.51 | 11111.19 | 10611.62 | 17337.74 | 11608.79 | 10537.82 | 15705.73 | 15767.71 |
| Gnaq    | 887.77   | 983.81   | 1053.14  | 957.93  | 986      | 941.74   | 987.65   | 327.33   | 793.56   | 995.2    | 1279.09  | 1250.49  |
| Gnas    | 5235.18  | 6040.43  | 5805.51  | 6837.65 | 6002.51  | 5870.35  | 6374.64  | 6303.89  | 6407.97  | 5910.28  | 9712.46  | 9094.58  |
| Gnb1    | 3803.05  | 3995.17  | 3889.36  | 3963.84 | 3567.96  | 3931.47  | 3936.33  | 3248.78  | 3439.64  | 3915.4   | 5997.94  | 5642.39  |
| Gngt1   | 1.06     | 0.98     | 2.48     | 3.46    | 0.88     | 1.68     | 1.5      | 2.73     | 2.58     | 2.69     | 8.18     | 1.05     |
| Grb2    | 950.5    | 1118.45  | 1015.94  | 1145.37 | 980.7    | 1022.32  | 1036.51  | 597.38   | 954.69   | 1021.18  | 1443.95  | 1450.36  |
| Gusb    | 873.95   | 913.04   | 1020.9   | 901.91  | 1230.51  | 1071     | 917.75   | 1001.09  | 1099.44  | 948.62   | 224.48   | 226.03   |
| H2-Ea   | 3.19     | 2.95     | 4.96     | 5.53    | 3.53     | 5.04     | 5.26     | 2.73     | 0.86     | 2.69     | 1.17     | 1.05     |
| H2-Eb1  | 398.7    | 148.41   | 226.5    | 207.49  | 44.14    | 87.29    | 31.57    | 245.5    | 52.56    | 41.21    | 19.88    | 26.16    |
| Hc      | 10.63    | 8.85     | 9.09     | 9.68    | 10.59    | 10.07    | 12.78    | 8.18     | 11.2     | 2.69     | 14.03    | 11.51    |
| Hdac4   | 162.67   | 193.62   | 163.68   | 217.87  | 144.77   | 162.83   | 178.14   | 319.15   | 189.56   | 165.72   | 246.7    | 201.96   |
| Hmgn1   | 964.32   | 1008.38  | 945.68   | 997.36  | 936.57   | 1065.96  | 964.35   | 430.99   | 929.7    | 837.54   | 812.59   | 869.59   |
| Hprt1   | 686.83   | 646.7    | 578.65   | 658.45  | 541.99   | 580.82   | 650.92   | 480.09   | 599.7    | 644.95   | 1169.19  | 1147.94  |
| Hras1   | 11.7     | 9.83     | 10.75    | 11.76   | 11.48    | 11.75    | 13.53    | 27.28    | 10.34    | 15.23    | 21.05    | 19.88    |
| Hspb1   | 4482.44  | 5961.8   | 4678.8   | 9074.44 | 6340.59  | 5830.06  | 6315.26  | 9058.94  | 5528.24  | 10983.02 | 809.08   | 729.37   |
| Hspb2   | 30.83    | 33.42    | 60.34    | 31.82   | 21.19    | 92.33    | 53.37    | 8.18     | 37.05    | 23.29    | 38.58    | 23.02    |
| Ifna1   | 6.38     | 12.78    | 7.44     | 6.22    | 5.3      | 11.75    | 9.02     | 21.82    | 6.03     | 12.54    | 9.35     | 10.46    |
| Ifnb1   | 7.44     | 13.76    | 9.09     | 11.07   | 4.41     | 8.39     | 7.52     | 13.64    | 4.31     | 8.06     | 14.03    | 7.33     |
| Ifng    | 3.19     | 4.91     | 3.31     | 8.99    | 0.88     | 1.68     | 4.51     | 13.64    | 7.75     | 4.48     | 7.02     | 5.23     |
| Il10    | 1.06     | 1.97     | 0.83     | 2.07    | 1.77     | 5.04     | 4.51     | 5.46     | 3.45     | 0.9      | 2.34     | 4.19     |
| Il10rb  | 507.14   | 482.57   | 567.08   | 451.65  | 481.08   | 444.85   | 405.13   | 240.04   | 417.03   | 382.49   | 211.62   | 166.38   |
| Il11    | 7.44     | 3.93     | 5.79     | 6.22    | 7.06     | 10.07    | 6.01     | 2.73     | 6.89     | 0.9      | 8.18     | 8.37     |
| Il12a   | 20.2     | 14.74    | 19.01    | 12.45   | 10.59    | 15.11    | 12.03    | 27.28    | 6.03     | 16.12    | 14.03    | 11.51    |
| Il12b   | 7.44     | 3.93     | 0.83     | 2.77    | 6.18     | 3.36     | 7.52     | 8.18     | 3.45     | 1.79     | 5.85     | 4.19     |
| Il13    | 18.07    | 19.66    | 11.57    | 17.29   | 10.59    | 13.43    | 8.27     | 19.09    | 16.37    | 14.33    | 23.38    | 18.84    |
| Il15    | 7.44     | 13.76    | 14.05    | 15.22   | 13.24    | 18.47    | 15.03    | 24.55    | 15.51    | 23.29    | 24.55    | 18.84    |
| Il18    | 475.25   | 444.24   | 453      | 544.33  | 454.6    | 397.85   | 484.05   | 422.81   | 393.77   | 447.88   | 512.11   | 624.72   |
| Il18rap | 9.57     | 9.83     | 8.27     | 13.83   | 7.94     | 16.79    | 9.02     | 13.64    | 6.89     | 6.27     | 8.18     | 11.51    |
| Il1a    | 22.33    | 25.55    | 32.24    | 19.37   | 40.61    | 33.57    | 13.53    | 43.64    | 35.33    | 21.5     | 5.85     | 7.33     |
| Il1b    | 19.14    | 5.9      | 13.23    | 9.68    | 23.83    | 28.54    | 12.78    | 13.64    | 7.75     | 13.44    | 3.51     | 3.14     |
| Il1r1   | 208.39   | 250.62   | 178.55   | 151.47  | 271      | 270.27   | 216.47   | 248.23   | 154.23   | 180.95   | 71.32    | 83.71    |
| Il1rap  | 951.56   | 1046.71  | 1014.29  | 803     | 963.93   | 956.85   | 847.85   | 327.33   | 836.65   | 875.17   | 857.02   | 1011.9   |
| Il1rn   | 12.76    | 9.83     | 9.09     | 10.37   | 13.24    | 20.14    | 18.04    | 16.37    | 14.65    | 7.17     | 11.69    | 4.19     |
| Il2     | 11.7     | 7.86     | 7.44     | 6.22    | 7.94     | 8.39     | 8.27     | 16.37    | 5.17     | 8.06     | 10.52    | 10.46    |
| Il22    | 4.25     | 14.74    | 6.61     | 11.07   | 6.18     | 8.39     | 9.02     | 8.18     | 9.48     | 8.96     | 9.35     | 7.33     |
| Il22ra2 | 2.13     | 3.93     | 2.48     | 2.77    | 1.77     | 3.36     | 0.75     | 2.73     | 2.58     | 2.69     | 4.68     | 4.19     |
| Il23a   | 4.25     | 4.91     | 4.13     | 7.61    | 7.06     | 6.71     | 5.26     | 2.73     | 7.75     | 7.17     | 5.85     | 10.46    |
| Il23r   | 12.76    | 7.86     | 12.4     | 7.61    | 6.18     | 10.07    | 12.03    | 16.37    | 12.92    | 4.48     | 16.37    | 13.6     |
| Il3     | 2.13     | 5.9      | 0.83     | 1.38    | 1.77     | 5.04     | 3.01     | 2.73     | 4.31     | 1.79     | 3.51     | 2.09     |
| Il4     | 2.13     | 2.95     | 9.09     | 4.84    | 2.65     | 1.68     | 4.51     | 2.73     | 4.31     | 8.06     | 8.18     | 3.14     |
| Il5     | 7.44     | 0.98     | 5.79     | 4.15    | 3.53     | 5.04     | 7.52     | 8.18     | 1.72     | 0.9      | 7.02     | 4.19     |
| Il6     | 4.25     | 5.9      | 16.53    | 15.22   | 11.48    | 15.11    | 9.77     | 5.46     | 8.62     | 9.85     | 12.86    | 8.37     |
| Il6ra   | 141.41   | 169.05   | 149.62   | 174.99  | 200.38   | 203.12   | 213.47   | 152.76   | 165.43   | 195.28   | 92.37    | 81.62    |
| Il7     | 22.33    | 26.54    | 19.84    | 29.05   | 16.77    | 38.61    | 27.81    | 8.18     | 21.54    | 24.19    | 31.57    | 30.35    |
| Il8ra   | 3.19     | 8.85     | 7.44     | 11.76   | 9.71     | 16.79    | 7.52     | 19.09    | 6.89     | 8.06     | 5.85     | 7.33     |
| Il8rb   | 12.76    | 15.73    | 10.75    | 10.37   | 7.06     | 43.65    | 15.03    | 19.09    | 19.82    | 8.06     | 5.85     | 6.28     |
| Il9     | 5.32     | 5.9      | 4.13     | 6.22    | 6.18     | 5.04     | 3.01     | 8.18     | 10.34    | 8.06     | 3.51     | 12.56    |
| Itgb2   | 291.32   | 306.64   | 303.38   | 353.43  | 406.05   | 417.99   | 331.47   | 158.21   | 403.24   | 268.73   | 26.89    | 35.58    |
| Jun     | 691.08   | 738.1    | 739.85   | 690.27  | 731.78   | 825.91   | 616.34   | 316.42   | 591.08   | 628.83   | 411.55   | 452.06   |
| Keap1   | 294.51   | 326.3    | 303.38   | 366.57  | 310.72   | 335.74   | 306.67   | 245.5    | 297.26   | 357.41   | 460.66   | 415.44   |
| Kng1    | 3.19     | 3.93     | 6.61     | 4.84    | 3.53     | 1.68     | 6.01     | 16.37    | 3.45     | 1.79     | 4.68     | 5.23     |

|          |         |         |         |         |         |         |         |         |         |         |         |         |
|----------|---------|---------|---------|---------|---------|---------|---------|---------|---------|---------|---------|---------|
| Limk1    | 726.16  | 842.28  | 795.23  | 844.5   | 686.76  | 820.87  | 715.56  | 545.55  | 703.95  | 767.67  | 1696.49 | 1566.52 |
| Lta      | 10.63   | 8.85    | 14.88   | 16.6    | 10.59   | 8.39    | 15.03   | 8.18    | 11.2    | 15.23   | 15.2    | 9.42    |
| Ltb      | 27.64   | 31.45   | 21.49   | 16.6    | 7.06    | 11.75   | 10.52   | 30.01   | 8.62    | 12.54   | 4.68    | 6.28    |
| Ly96     | 108.45  | 100.25  | 125.65  | 134.87  | 106.81  | 151.08  | 132.29  | 90.02   | 127.52  | 122.72  | 76      | 86.85   |
| Maff     | 82.93   | 55.04   | 70.26   | 112.74  | 81.21   | 88.97   | 48.86   | 171.85  | 71.52   | 106.6   | 9.35    | 11.51   |
| Mafg     | 120.14  | 159.22  | 138.88  | 139.02  | 173.9   | 119.19  | 142.81  | 196.4   | 150.79  | 137.05  | 204.61  | 192.54  |
| Mafk     | 127.58  | 164.13  | 142.18  | 181.21  | 116.52  | 134.29  | 147.32  | 169.12  | 123.21  | 180.05  | 59.63   | 77.44   |
| Map2k1   | 2584.63 | 2683.11 | 2595.66 | 2597.14 | 2621.68 | 2467.66 | 2616.45 | 1347.52 | 2321.24 | 2791.22 | 3270.22 | 3475.22 |
| Map2k4   | 1182.27 | 1495.86 | 1339.16 | 1469.06 | 1040.73 | 1198.58 | 1377    | 791.05  | 1253.68 | 1276.47 | 2802.55 | 2623.42 |
| Map2k6   | 90.37   | 106.14  | 84.32   | 132.11  | 84.74   | 68.83   | 99.97   | 81.83   | 87.02   | 108.39  | 159.01  | 181.03  |
| Map3k1   | 182.87  | 232.93  | 232.29  | 224.79  | 180.08  | 169.55  | 174.38  | 272.78  | 168.88  | 174.67  | 159.01  | 170.57  |
| Map3k5   | 221.14  | 242.76  | 200.05  | 270.43  | 233.92  | 209.84  | 224.74  | 259.14  | 203.35  | 233.8   | 295.81  | 338     |
| Map3k7   | 1000.47 | 1042.77 | 958.08  | 1010.5  | 1058.38 | 966.92  | 1055.3  | 575.56  | 803.9   | 1123.29 | 1280.26 | 1285.02 |
| Map3k9   | 10.63   | 20.64   | 13.23   | 22.82   | 16.77   | 20.14   | 19.54   | 38.19   | 14.65   | 25.98   | 23.38   | 24.07   |
| Mapk1    | 453.98  | 437.36  | 439.77  | 489     | 439.6   | 369.31  | 460.75  | 259.14  | 354.13  | 446.09  | 496.91  | 481.36  |
| Mapk14   | 418.9   | 458.98  | 461.27  | 421.21  | 402.52  | 409.6   | 456.24  | 283.69  | 442.88  | 463.11  | 460.66  | 515.89  |
| Mapk3    | 2043.46 | 1981.37 | 1937.65 | 2012.01 | 2172.38 | 2286.36 | 2044.45 | 1606.66 | 2190.27 | 1781.68 | 2521.94 | 2468.54 |
| Mapk8    | 617.72  | 642.77  | 619.16  | 587.9   | 532.28  | 567.39  | 623.86  | 466.45  | 549.72  | 575.98  | 1033.56 | 1027.6  |
| Mapkapk2 | 599.64  | 529.74  | 591.05  | 545.02  | 541.99  | 542.21  | 438.96  | 351.88  | 494.58  | 497.15  | 360.11  | 365.21  |
| Mapkapk5 | 532.66  | 668.32  | 596.84  | 640.47  | 548.17  | 611.04  | 547.94  | 600.11  | 554.89  | 628.83  | 743.6   | 786.92  |
| Masp1    | 141.41  | 138.58  | 171.94  | 145.25  | 187.14  | 161.15  | 142.81  | 114.57  | 151.65  | 158.55  | 132.12  | 150.69  |
| Masp2    | 1.06    | 27.52   | 20.67   | 35.27   | 22.07   | 11.75   | 29.31   | 46.37   | 16.37   | 14.33   | 37.41   | 30.35   |
| Max      | 150.97  | 168.06  | 156.24  | 163.92  | 128.88  | 176.26  | 161.6   | 324.61  | 138.72  | 146.91  | 180.06  | 161.15  |
| Mbl2     | 9.57    | 9.83    | 11.57   | 10.37   | 5.3     | 8.39    | 9.77    | 2.73    | 7.75    | 5.37    | 17.54   | 6.28    |
| Mef2a    | 243.47  | 210.32  | 191.78  | 189.51  | 219.8   | 154.44  | 235.26  | 60.01   | 114.6   | 227.53  | 192.92  | 209.29  |
| Mef2b    | 6.38    | 5.9     | 10.75   | 8.3     | 4.41    | 5.04    | 5.26    | 10.91   | 5.17    | 6.27    | 14.03   | 8.37    |
| Mef2c    | 242.41  | 189.68  | 229.81  | 212.34  | 326.61  | 263.55  | 241.28  | 193.67  | 249.87  | 230.21  | 166.02  | 168.48  |
| Mef2d    | 91.43   | 97.3    | 89.28   | 134.87  | 92.69   | 90.65   | 108.99  | 155.48  | 99.09   | 94.95   | 164.86  | 138.13  |
| Mknk1    | 191.38  | 216.22  | 233.94  | 244.15  | 228.62  | 238.37  | 248.04  | 264.59  | 203.35  | 226.63  | 288.79  | 306.61  |
| Myc      | 190.31  | 195.58  | 221.54  | 179.83  | 222.45  | 206.48  | 155.59  | 264.59  | 176.63  | 184.53  | 64.31   | 58.6    |
| Myd88    | 130.77  | 135.63  | 141.36  | 137.64  | 99.75   | 115.83  | 105.98  | 92.74   | 124.08  | 105.7   | 74.83   | 68.02   |
| Myl2     | 12.76   | 21.62   | 14.88   | 8.99    | 22.07   | 33.57   | 17.29   | 35.46   | 130.11  | 18.81   | 26.89   | 19.88   |
| Nfatc3   | 158.42  | 155.29  | 159.54  | 163.23  | 144.77  | 122.54  | 154.84  | 130.93  | 145.62  | 157.66  | 201.1   | 220.8   |
| Nfe2l2   | 1075.96 | 884.54  | 970.48  | 845.2   | 1157.25 | 990.42  | 1047.03 | 851.07  | 922.81  | 979.97  | 522.63  | 526.36  |
| Nfkb1    | 320.02  | 335.14  | 333.96  | 367.96  | 361.03  | 340.77  | 381.08  | 400.98  | 306.74  | 357.41  | 308.67  | 298.23  |
| Nos2     | 18.07   | 19.66   | 19.84   | 19.37   | 15.89   | 21.82   | 19.54   | 35.46   | 24.13   | 12.54   | 32.74   | 29.3    |
| Nox1     | 3.19    | 0.98    | 3.31    | 1.38    | 4.41    | 3.36    | 3.76    | 2.73    | 2.58    | 1.79    | 4.68    | 4.19    |
| Nr3c1    | 745.3   | 744     | 866.32  | 696.49  | 775.91  | 770.51  | 771.93  | 564.65  | 653.12  | 634.2   | 894.43  | 995.16  |
| Pdgfra   | 741.05  | 826.55  | 782.83  | 835.51  | 878.31  | 862.84  | 809.51  | 935.63  | 694.48  | 872.48  | 889.75  | 757.62  |
| Pgk1     | 2278.43 | 1706.18 | 1790.51 | 1978.81 | 1916.39 | 1962.38 | 1972.3  | 3074.2  | 2230.77 | 1861.41 | 2766.3  | 2654.81 |
| Pik3c2g  | 2.13    | 3.93    | 6.61    | 7.61    | 4.41    | 1.68    | 6.01    | 5.46    | 6.03    | 7.17    | 10.52   | 7.33    |
| Pla2g4a  | 112.7   | 70.76   | 101.68  | 67.78   | 69.74   | 80.58   | 80.43   | 95.47   | 55.14   | 71.66   | 90.03   | 88.95   |
| Plcb1    | 755.93  | 751.86  | 648.09  | 951.71  | 737.96  | 631.18  | 837.32  | 651.94  | 566.09  | 653.02  | 1085.01 | 1212.82 |
| Ppp1r12b | 141.41  | 158.23  | 152.93  | 185.36  | 167.72  | 125.9   | 175.13  | 180.03  | 132.69  | 150.49  | 267.74  | 259.52  |
| Prkca    | 730.42  | 858.99  | 772.08  | 880.47  | 813.87  | 642.93  | 889.19  | 327.33  | 522.15  | 844.71  | 858.19  | 949.12  |
| Prkcb1   | 838.86  | 927.78  | 876.24  | 916.44  | 827.99  | 700.01  | 803.5   | 395.53  | 598.84  | 713.93  | 1068.64 | 1044.34 |
| Ptk2     | 390.19  | 478.63  | 423.24  | 414.3   | 364.56  | 423.03  | 415.66  | 330.06  | 369.64  | 386.97  | 523.8   | 456.25  |
| Rac1     | 4251.72 | 4614.35 | 4591.18 | 4400.27 | 4581.32 | 4515.65 | 4630.09 | 1470.27 | 4147.04 | 4521.84 | 5305.78 | 5126.49 |
| Raf1     | 671.94  | 760.7   | 758.03  | 799.55  | 729.13  | 639.58  | 728.34  | 681.94  | 657.43  | 780.21  | 1082.67 | 1029.69 |
| Rapgef2  | 670.88  | 870.78  | 839.04  | 952.4   | 692.05  | 688.26  | 847.1   | 368.25  | 669.49  | 928.91  | 1335.21 | 1343.63 |
| Rhoa     | 2667.56 | 2497.35 | 2534.49 | 2526.6  | 2618.15 | 2603.63 | 2498.44 | 1524.83 | 2570.25 | 2420.37 | 2408.53 | 2403.67 |
| Ripk1    | 102.07  | 98.28   | 103.33  | 105.13  | 109.46  | 100.72  | 87.94   | 62.74   | 79.27   | 87.79   | 71.32   | 76.39   |
| Ripk2    | 69.11   | 75.68   | 73.57   | 62.94   | 76.8    | 58.75   | 61.63   | 81.83   | 50.84   | 81.51   | 79.5    | 75.34   |
| Rock2    | 190.31  | 228.01  | 172.77  | 208.88  | 210.97  | 204.8   | 238.27  | 111.84  | 174.05  | 192.59  | 282.94  | 305.56  |
| Rps6ka5  | 303.01  | 305.66  | 323.22  | 348.59  | 285.12  | 211.51  | 327.71  | 201.86  | 260.21  | 300.08  | 459.49  | 464.62  |
| Shc1     | 158.42  | 178.87  | 173.6   | 169.45  | 193.32  | 250.12  | 143.56  | 286.42  | 135.28  | 152.28  | 144.98  | 165.34  |
| Stat1    | 1268.39 | 666.35  | 998.58  | 830.67  | 395.46  | 496.89  | 366.8   | 654.67  | 243.84  | 292.02  | 382.33  | 387.18  |

|         |         |         |         |         |         |         |         |        |         |         |         |         |
|---------|---------|---------|---------|---------|---------|---------|---------|--------|---------|---------|---------|---------|
| Tgfb1   | 339.16  | 298.78  | 351.32  | 309.17  | 448.42  | 464.99  | 366.05  | 297.33 | 399.8   | 327.85  | 120.43  | 93.13   |
| Tgfb2   | 296.63  | 363.64  | 319.08  | 294.64  | 362.8   | 307.2   | 318.69  | 343.7  | 322.25  | 386.08  | 223.32  | 211.38  |
| Tgfb3   | 237.09  | 247.67  | 254.61  | 235.85  | 225.98  | 240.05  | 194.67  | 215.49 | 230.06  | 248.13  | 307.5   | 341.14  |
| Tgfb1   | 718.72  | 562.17  | 573.69  | 614.18  | 1140.48 | 950.13  | 927.52  | 370.98 | 882.31  | 945.93  | 356.6   | 390.32  |
| Tlr1    | 90.37   | 66.83   | 97.54   | 79.54   | 129.76  | 102.4   | 77.42   | 60.01  | 74.1    | 94.95   | 12.86   | 7.33    |
| Tlr2    | 167.99  | 130.72  | 143.01  | 132.11  | 215.38  | 157.8   | 185.65  | 264.59 | 167.16  | 171.09  | 40.92   | 29.3    |
| Tlr3    | 388.07  | 286     | 348.02  | 340.98  | 385.75  | 342.45  | 317.19  | 250.96 | 305.88  | 346.66  | 295.81  | 297.19  |
| Tlr4    | 106.32  | 92.39   | 107.46  | 78.85   | 94.45   | 102.4   | 75.92   | 46.37  | 76.69   | 75.24   | 22.21   | 25.11   |
| Tlr5    | 4.25    | 6.88    | 8.27    | 11.76   | 10.59   | 10.07   | 6.76    | 16.37  | 12.92   | 8.06    | 12.86   | 11.51   |
| Tlr6    | 73.36   | 45.21   | 84.32   | 65.02   | 82.09   | 73.86   | 59.38   | 38.19  | 57.73   | 72.56   | 18.71   | 16.74   |
| Tlr7    | 161.61  | 160.2   | 135.57  | 228.24  | 175.66  | 157.8   | 165.36  | 100.93 | 163.71  | 126.3   | 28.06   | 25.11   |
| Tnf     | 24.45   | 23.59   | 21.49   | 21.44   | 15.01   | 11.75   | 9.77    | 5.46   | 22.4    | 10.75   | 4.68    | 3.14    |
| Tnfsf14 | 8.51    | 5.9     | 10.75   | 12.45   | 0.88    | 8.39    | 3.76    | 2.73   | 1.72    | 1.79    | 4.68    | 1.05    |
| Tollip  | 1118.48 | 1369.07 | 1243.27 | 1366.01 | 1189.91 | 1134.79 | 1283.05 | 1257.5 | 1031.38 | 1338.28 | 1592.44 | 1684.76 |
| Tradd   | 47.84   | 49.14   | 47.95   | 52.57   | 49.43   | 48.68   | 38.33   | 43.64  | 56.01   | 46.58   | 76      | 53.37   |
| Traf2   | 102.07  | 113.02  | 85.97   | 92.68   | 89.15   | 100.72  | 97.71   | 73.65  | 77.55   | 83.31   | 113.41  | 74.3    |
| Tubb5   | 328.53  | 231.95  | 228.98  | 242.77  | 327.49  | 407.92  | 317.94  | 289.14 | 335.18  | 259.77  | 266.58  | 196.73  |



Supplemental Table 2B

**Genes that IL-10 treatment decreases in SOD1G93A mice**

| Description | Fold change IL0 TG vs Control TG | p value    | Fold change Control TG vs Control NTG | p value    |
|-------------|----------------------------------|------------|---------------------------------------|------------|
| Ccl3        | 0.421126891                      | 0.00596471 | 24.31828442                           | 0.10301457 |
| Cxcl10      | 1.160729455                      | 0.91599879 | 13.08696432                           | 0.0181666  |
| C3ar1       | 1.274536578                      | 0.00058935 | 12.55446257                           | 0.15606918 |
| Ccl4        | 0.581682489                      | 0.11508226 | 12.55145249                           | 0.18290165 |
| Ccl11       | 0.21407287                       | 0.52163025 | 12.17312448                           | 0.61306914 |
| Ccl2        | 1.715844833                      | 0.19991044 | 11.00290135                           | 0.17083969 |
| Itgb2       | 0.947859434                      | 0.74393547 | 10.59543247                           | 0.14690729 |
| Hspb1       | 0.823863478                      | 0.17551381 | 9.545562092                           | 0.22540143 |
| C1qa        | 1.511316343                      | 0.00727702 | 9.215329038                           | 0.06234962 |
| Maff        | 0.846127485                      | 0.41972122 | 9.092521572                           | 0.13136971 |
| Tlr1        | 0.930900045                      | 0.59492979 | 8.892851246                           | 0.11165838 |
| C1qb        | 1.269523177                      | 0.06591179 | 8.249667529                           | 0.0766675  |
| C1r         | 1.526296688                      | 0.03318592 | 6.613754957                           | 0.04749811 |
| Cfb         | 1.213633313                      | 0.0384967  | 5.764882871                           | 0.0898619  |
| Tlr7        | 1.155851016                      | 0.41470923 | 5.578082879                           | 0.09198212 |
| Tlr2        | 0.740954832                      | 0.15222581 | 5.514430836                           | 0.03689271 |
| Il1b        | 0.719393879                      | 0.98478855 | 5.011528822                           | 0.25139401 |
| Il1a        | 0.793043894                      | 0.72669839 | 4.759231158                           | 0.21475602 |
| Gusb        | 0.887737082                      | 0.41640576 | 4.638010255                           | 0.06053595 |
| C3          | 0.935802728                      | 0.6041558  | 4.573895114                           | 0.1190215  |
| C1s         | 1.68734834                       | 0.00869714 | 3.979353117                           | 0.01954575 |
| Ccr1        | 1.498988342                      | 0.26894353 | 3.848350019                           | 0.06047705 |
| Tlr6        | 1.047041505                      | 0.48779054 | 3.608932769                           | 0.11161329 |
| Tgfb1       | 0.845170627                      | 0.22275996 | 3.59686583                            | 0.05515361 |
| C4a         | 1.643681181                      | 0.01049309 | 3.442837394                           | 0.10517196 |
| Tlr4        | 1.225996136                      | 0.00443972 | 3.318329107                           | 0.02645733 |
| Myc         | 0.975724425                      | 0.96537266 | 3.282266157                           | 0.03632734 |
| Cxcr4       | 1.456248034                      | 0.10316781 | 3.101468019                           | 0.02317108 |
| Il8rb       | 0.660234229                      | 0.46440186 | 3.097279472                           | 0.41931926 |
| Ccl7        | 1.206685001                      | 0.4249862  | 3.095612312                           | 0.31639558 |
| Cxcl1       | 1.106826292                      | 0.34576055 | 2.957780048                           | 0.0544806  |
| Il1r1       | 0.882485181                      | 0.94934957 | 2.883635425                           | 0.05053341 |
| Cebpb       | 1.259709414                      | 0.11207092 | 2.808266682                           | 0.01262807 |
| Fos         | 1.162153209                      | 0.72370784 | 2.760775074                           | 0.27796064 |
| Tgfb1       | 0.709774119                      | 0.33730007 | 2.32838412                            | 0.01759894 |
| Cfl1        | 0.704897791                      | 0.15807657 | 2.242769231                           | 0.0565902  |
| Il6ra       | 0.842685149                      | 0.2834392  | 2.165718336                           | 0.13630357 |
| Mafk        | 1.059895923                      | 0.86147395 | 2.116947545                           | 0.14684997 |
| Il1rn       | 0.703883495                      | 0.25488226 | 1.880982368                           | 0.00214349 |
| Myl2        | 0.339570946                      | 0.28902359 | 1.833867864                           | 0.5065991  |

**Genes that IL-10 treatment increases in SOD1G93A mice**

| Description | Fold change IL0 TG vs Control TG | p value    | Fold change Control TG vs Control NTG | p value    |
|-------------|----------------------------------|------------|---------------------------------------|------------|
| Ccl8        | 19.40885209                      | 0.02972633 | 5.864612512                           | 0.75921918 |
| Stat1       | 2.304784707                      | 0.05713076 | 1.061142805                           | 0.11673392 |
| Cd40        | 2.476083539                      | 0.0696555  | 0.791644444                           | 0.83508739 |
| Prkcb1      | 1.321595128                      | 0.06836651 | 0.637298981                           | 0.10979231 |
| Rps6ka5     | 1.210672617                      | 0.26169641 | 0.572258714                           | 0.06060502 |
| Elk1        | 1.12930946                       | 0.11671736 | 0.540813495                           | 0.1412591  |
| Atf2        | 1.212553721                      | 0.3308764  | 0.536494371                           | 0.09178314 |
| Mapk8       | 1.116309475                      | 0.09336257 | 0.536215853                           | 0.0219184  |
| Creb1       | 1.408791556                      | 0.10548281 | 0.531057612                           | 0.18968553 |
| Rapgef2     | 1.192078797                      | 0.45578017 | 0.52187514                            | 0.14531727 |
| Map2k6      | 1.16698067                       | 0.57766876 | 0.520311336                           | 0.00286109 |
| Hprt1       | 1.102180382                      | 0.43403755 | 0.503276323                           | 0.03942366 |
| Limk1       | 1.134869445                      | 0.14840331 | 0.433174686                           | 0.06856671 |

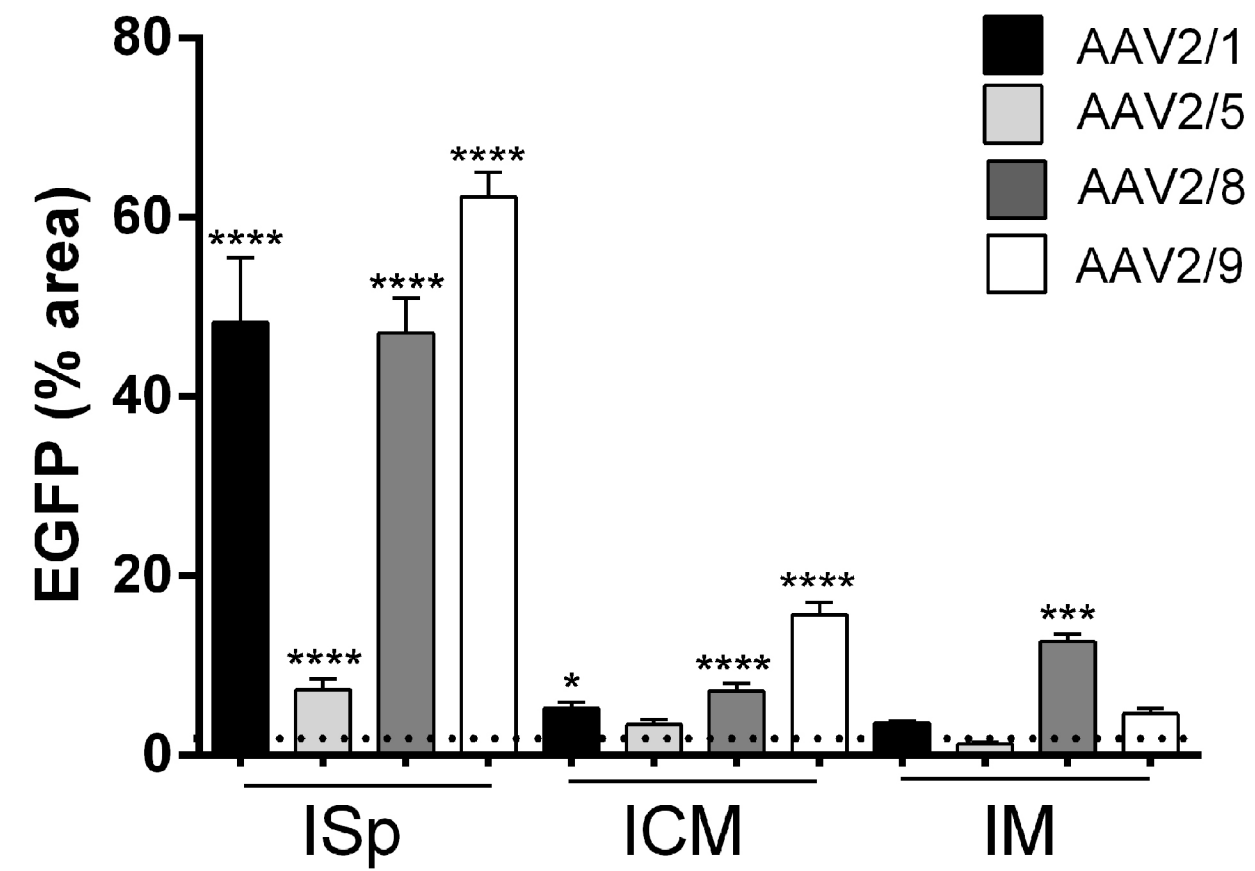

Supplemental Fig. 1 EGFP immunostaining (presented as % area) of each cohort was quantified by averaging the positive pixel count output (Aperio) from three slides spaced 25 mm apart, each containing two consecutive sections. The dotted line represents the background staining levels stained at the same time. 1-way Anova with Dunnett's test for multiple comparison. N=3 mice/cohort; \*\*\*\*p<0.0001; \*\*\*p<0.001; \*p<0.05

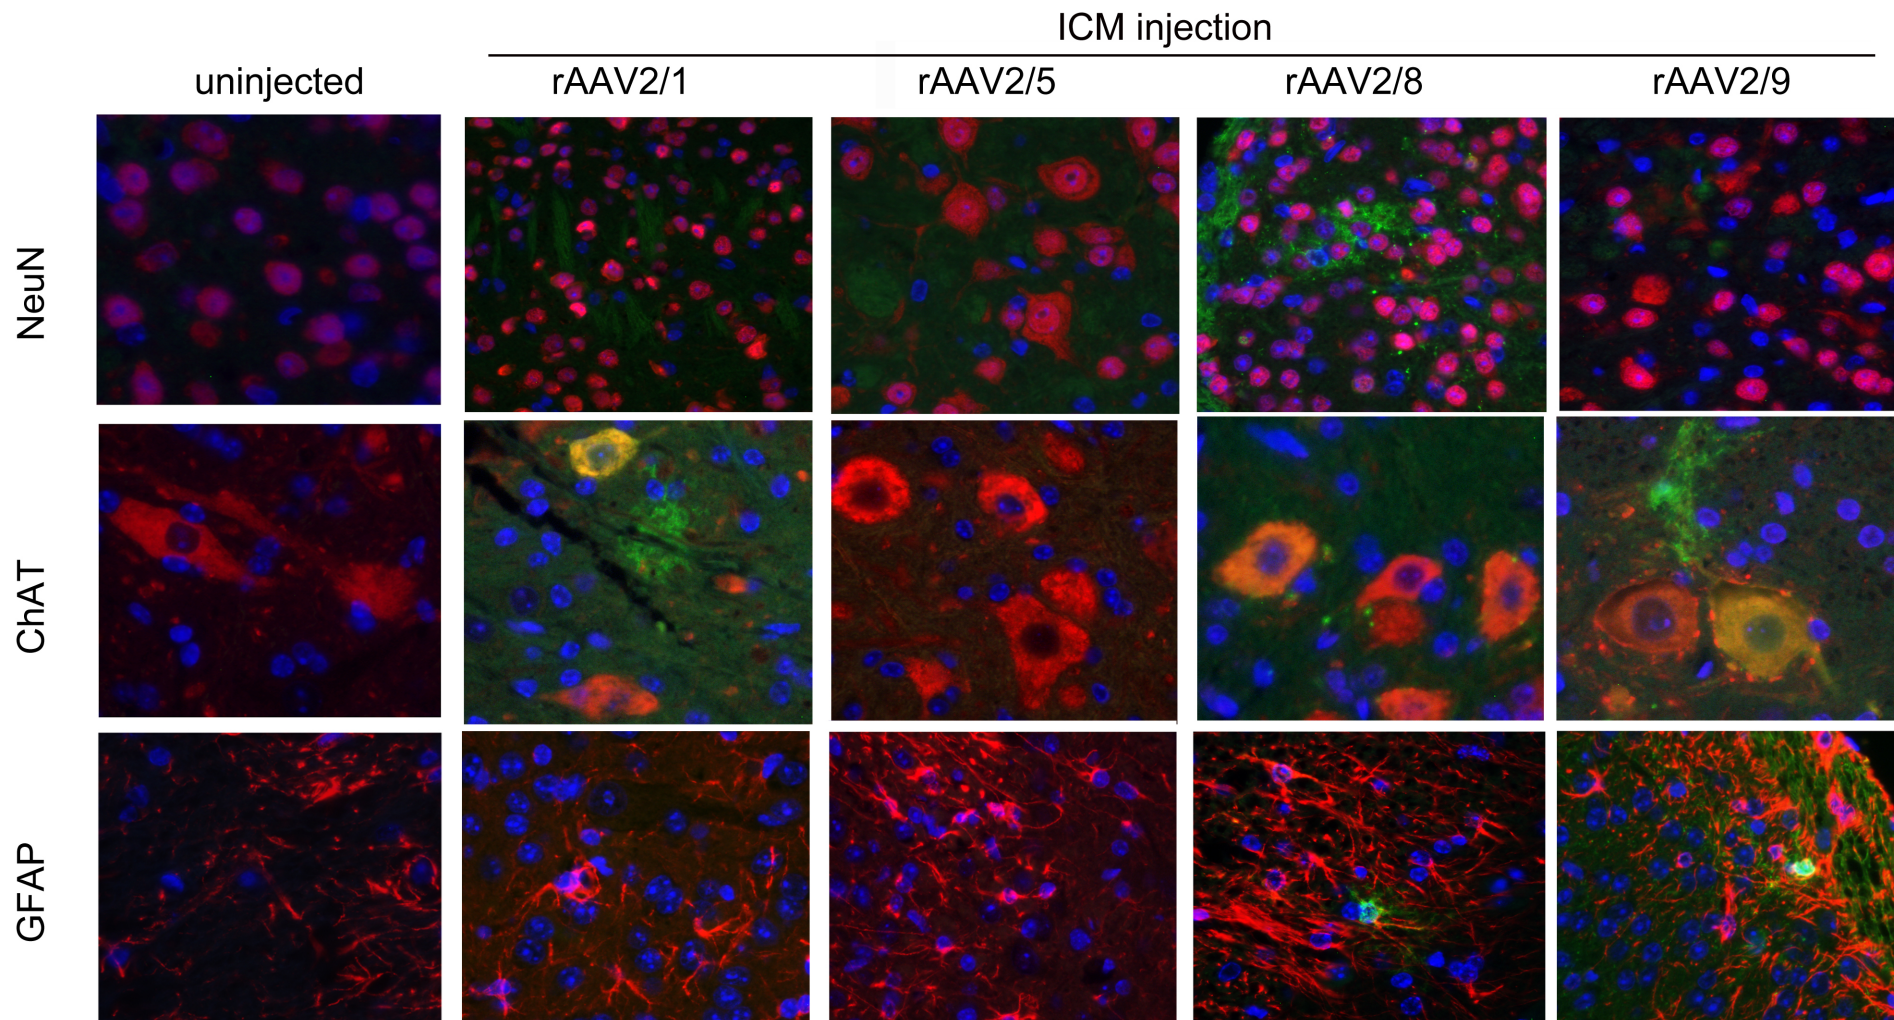

Supplemental Figure 2. Cellular tropism in the spinal cord following ICM delivery of rAAVs in neonatal mice. Representative tricolor merged fluorescent photomicrograph from 3-week-old mice spinal cord sections were generated following co-labeling with anti EGFP antibody (488nm - green), DAPI (350nm - blue) and cell type specific marker antibodies (568nm - red) for neurons (NeuN), motor neurons (ChAT) and astrocytes (GFAP). Magnification, 400x.



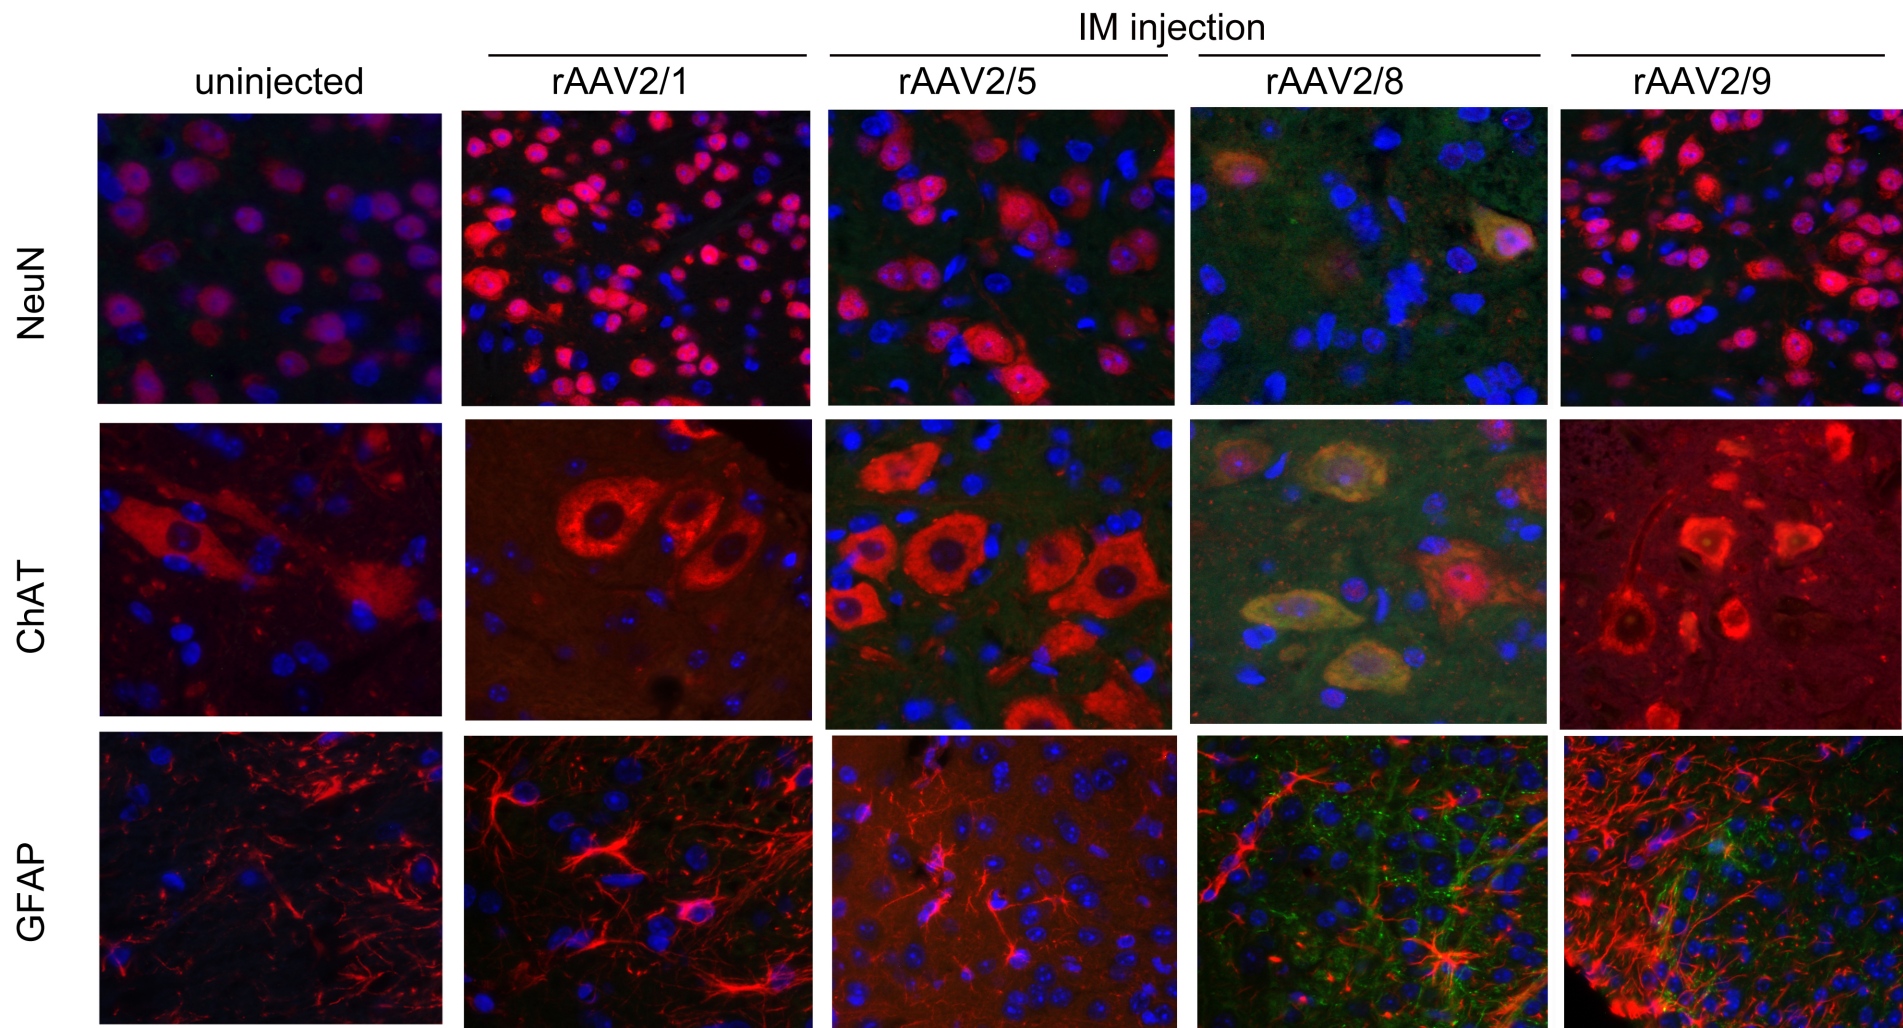

Supplemental Figure 3. Cellular tropism in the spinal cord following IM delivery of rAAVs in neonatal mice. Representative tricolor merged fluorescent photomicrograph from 3-week-old mice spinal cord sections were generated following co-labeling with anti EGFP antibody (488nm - green), DAPI (350nm - blue) and cell type specific marker antibodies (568nm - red) for neurons (NeuN), motor neurons (ChAT) and astrocytes (GFAP). Magnification, 400x.



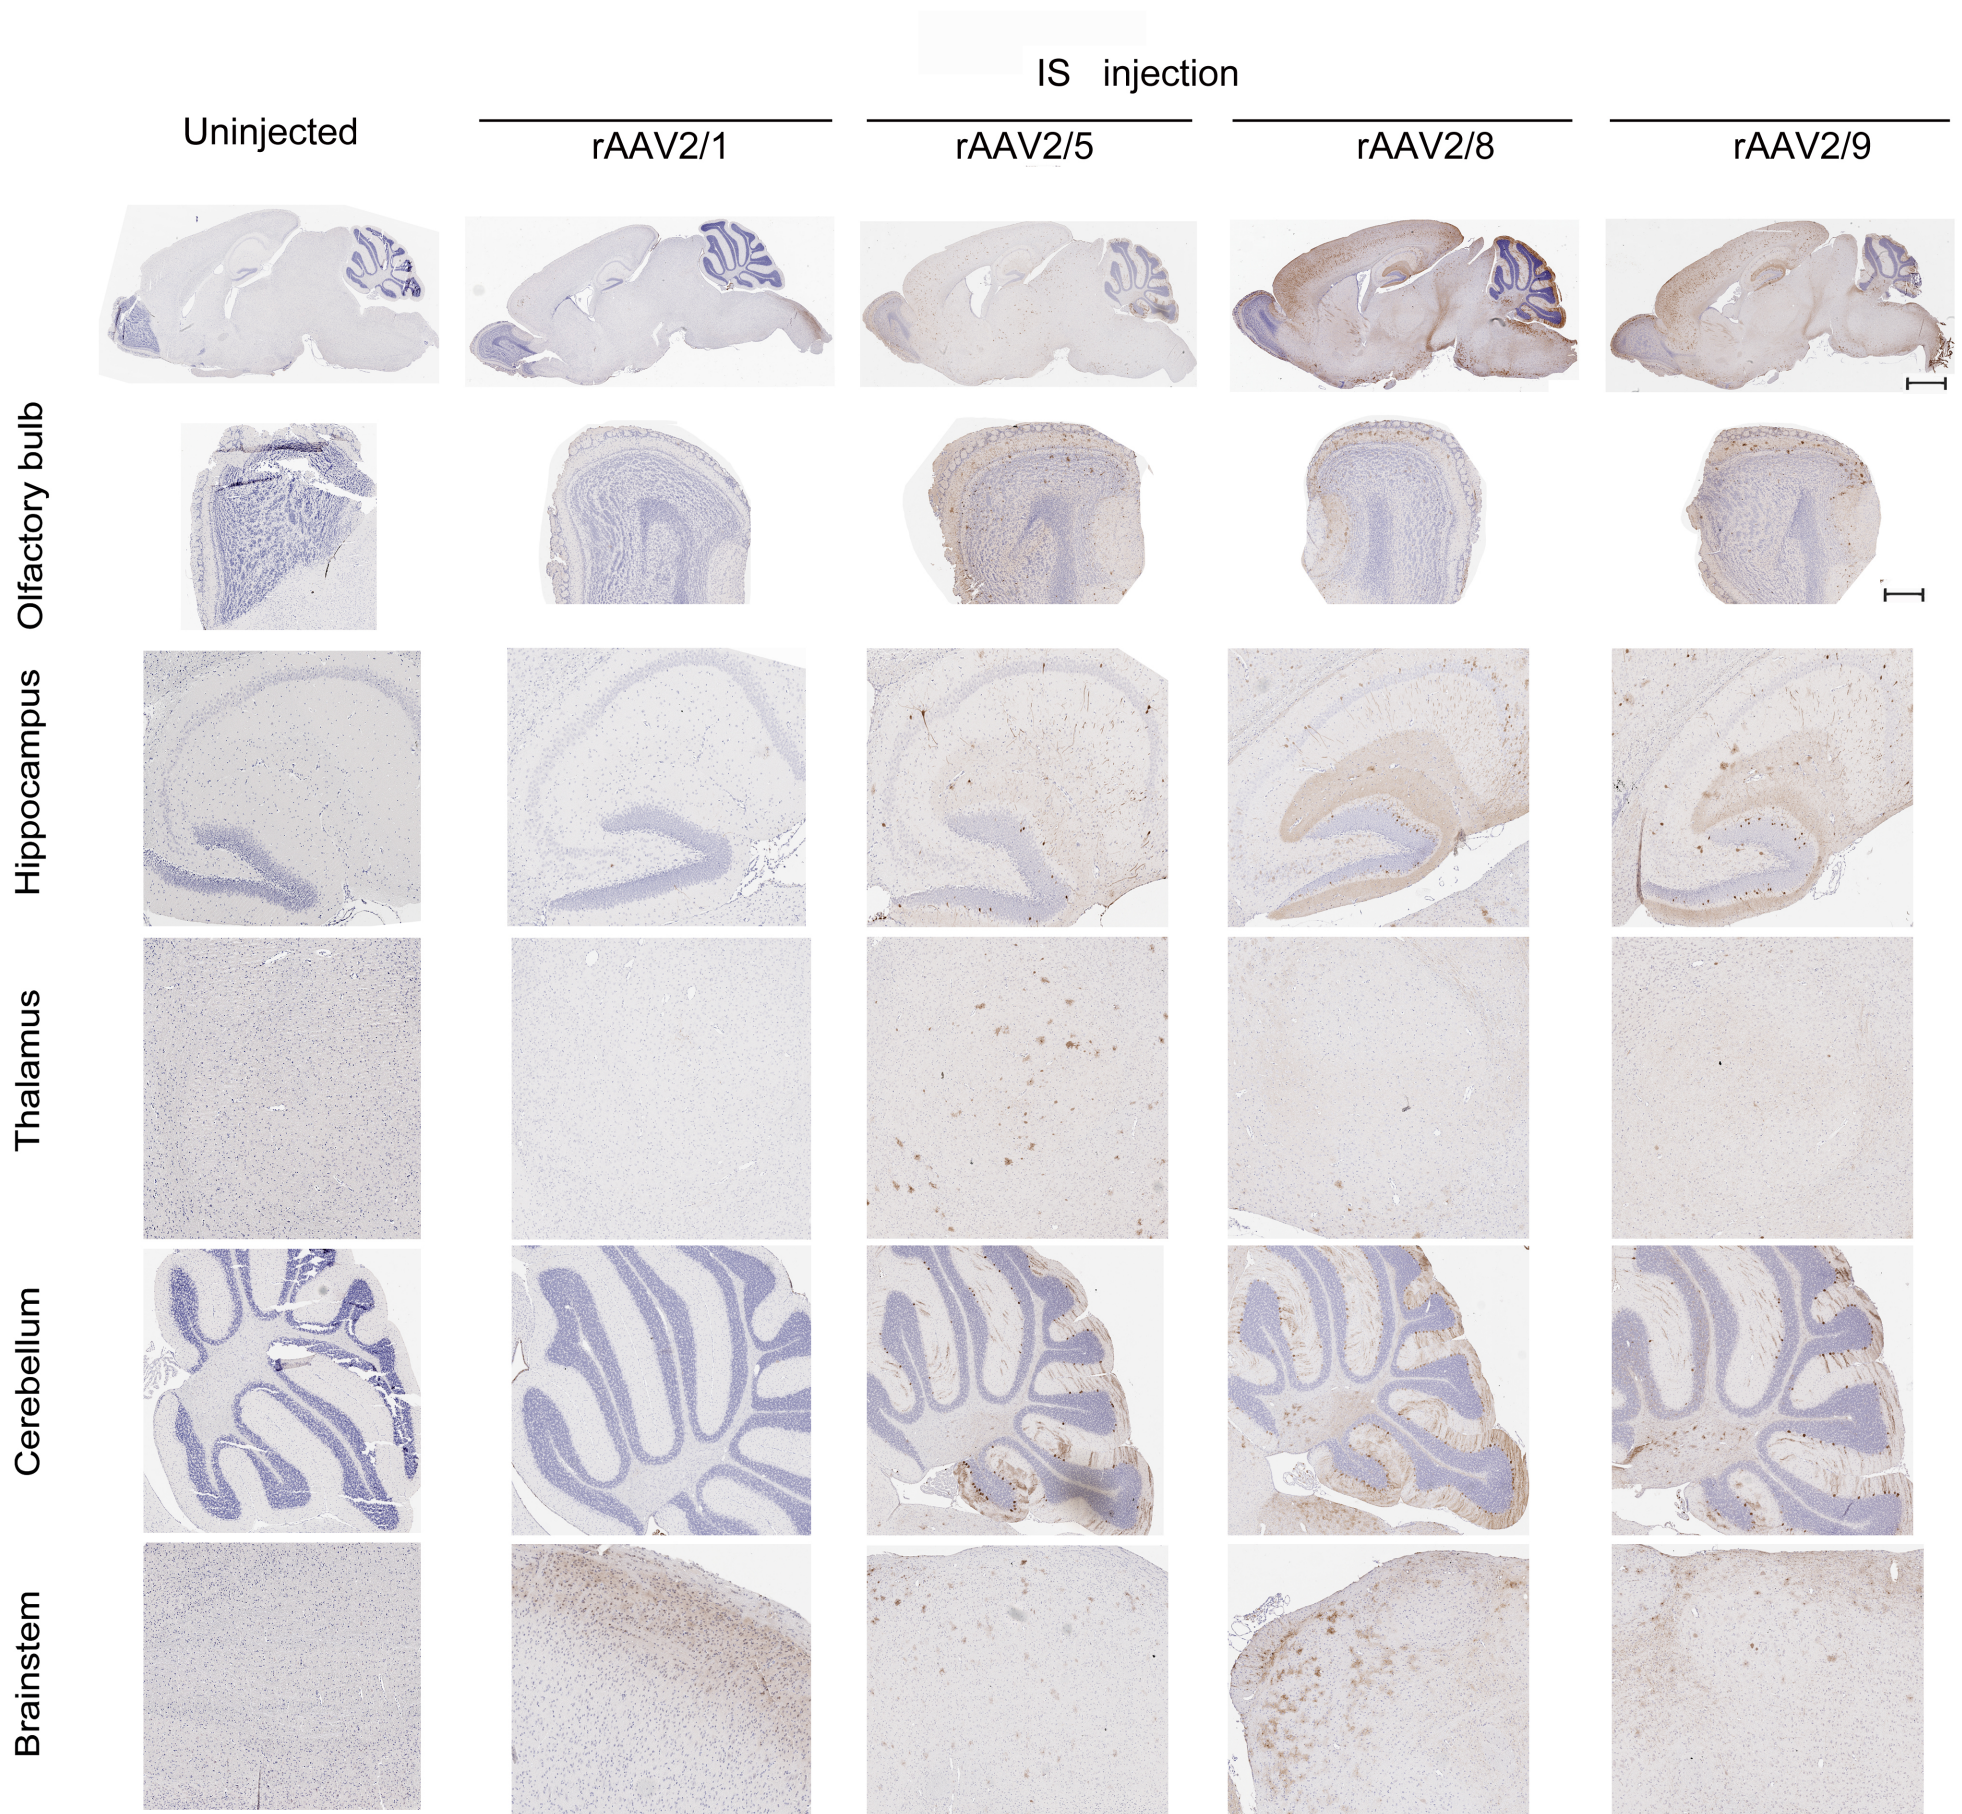

Supplemental Figure 4. EGFP expression in mice brains injected IS with rAAV-EGFP on neonatal day P0. Representative sections from 3 week old mice show EGFP staining in different areas of the brain. Olf, olfactory bulb, hip, hippocampus, thal, thalamus, cereb, cerebellum, brainst, brain stem. For cortical distribution, please see Figure 4. Scale bar, top panel, 2mm; others, 500µm. n=3-4/group.



ICM injection

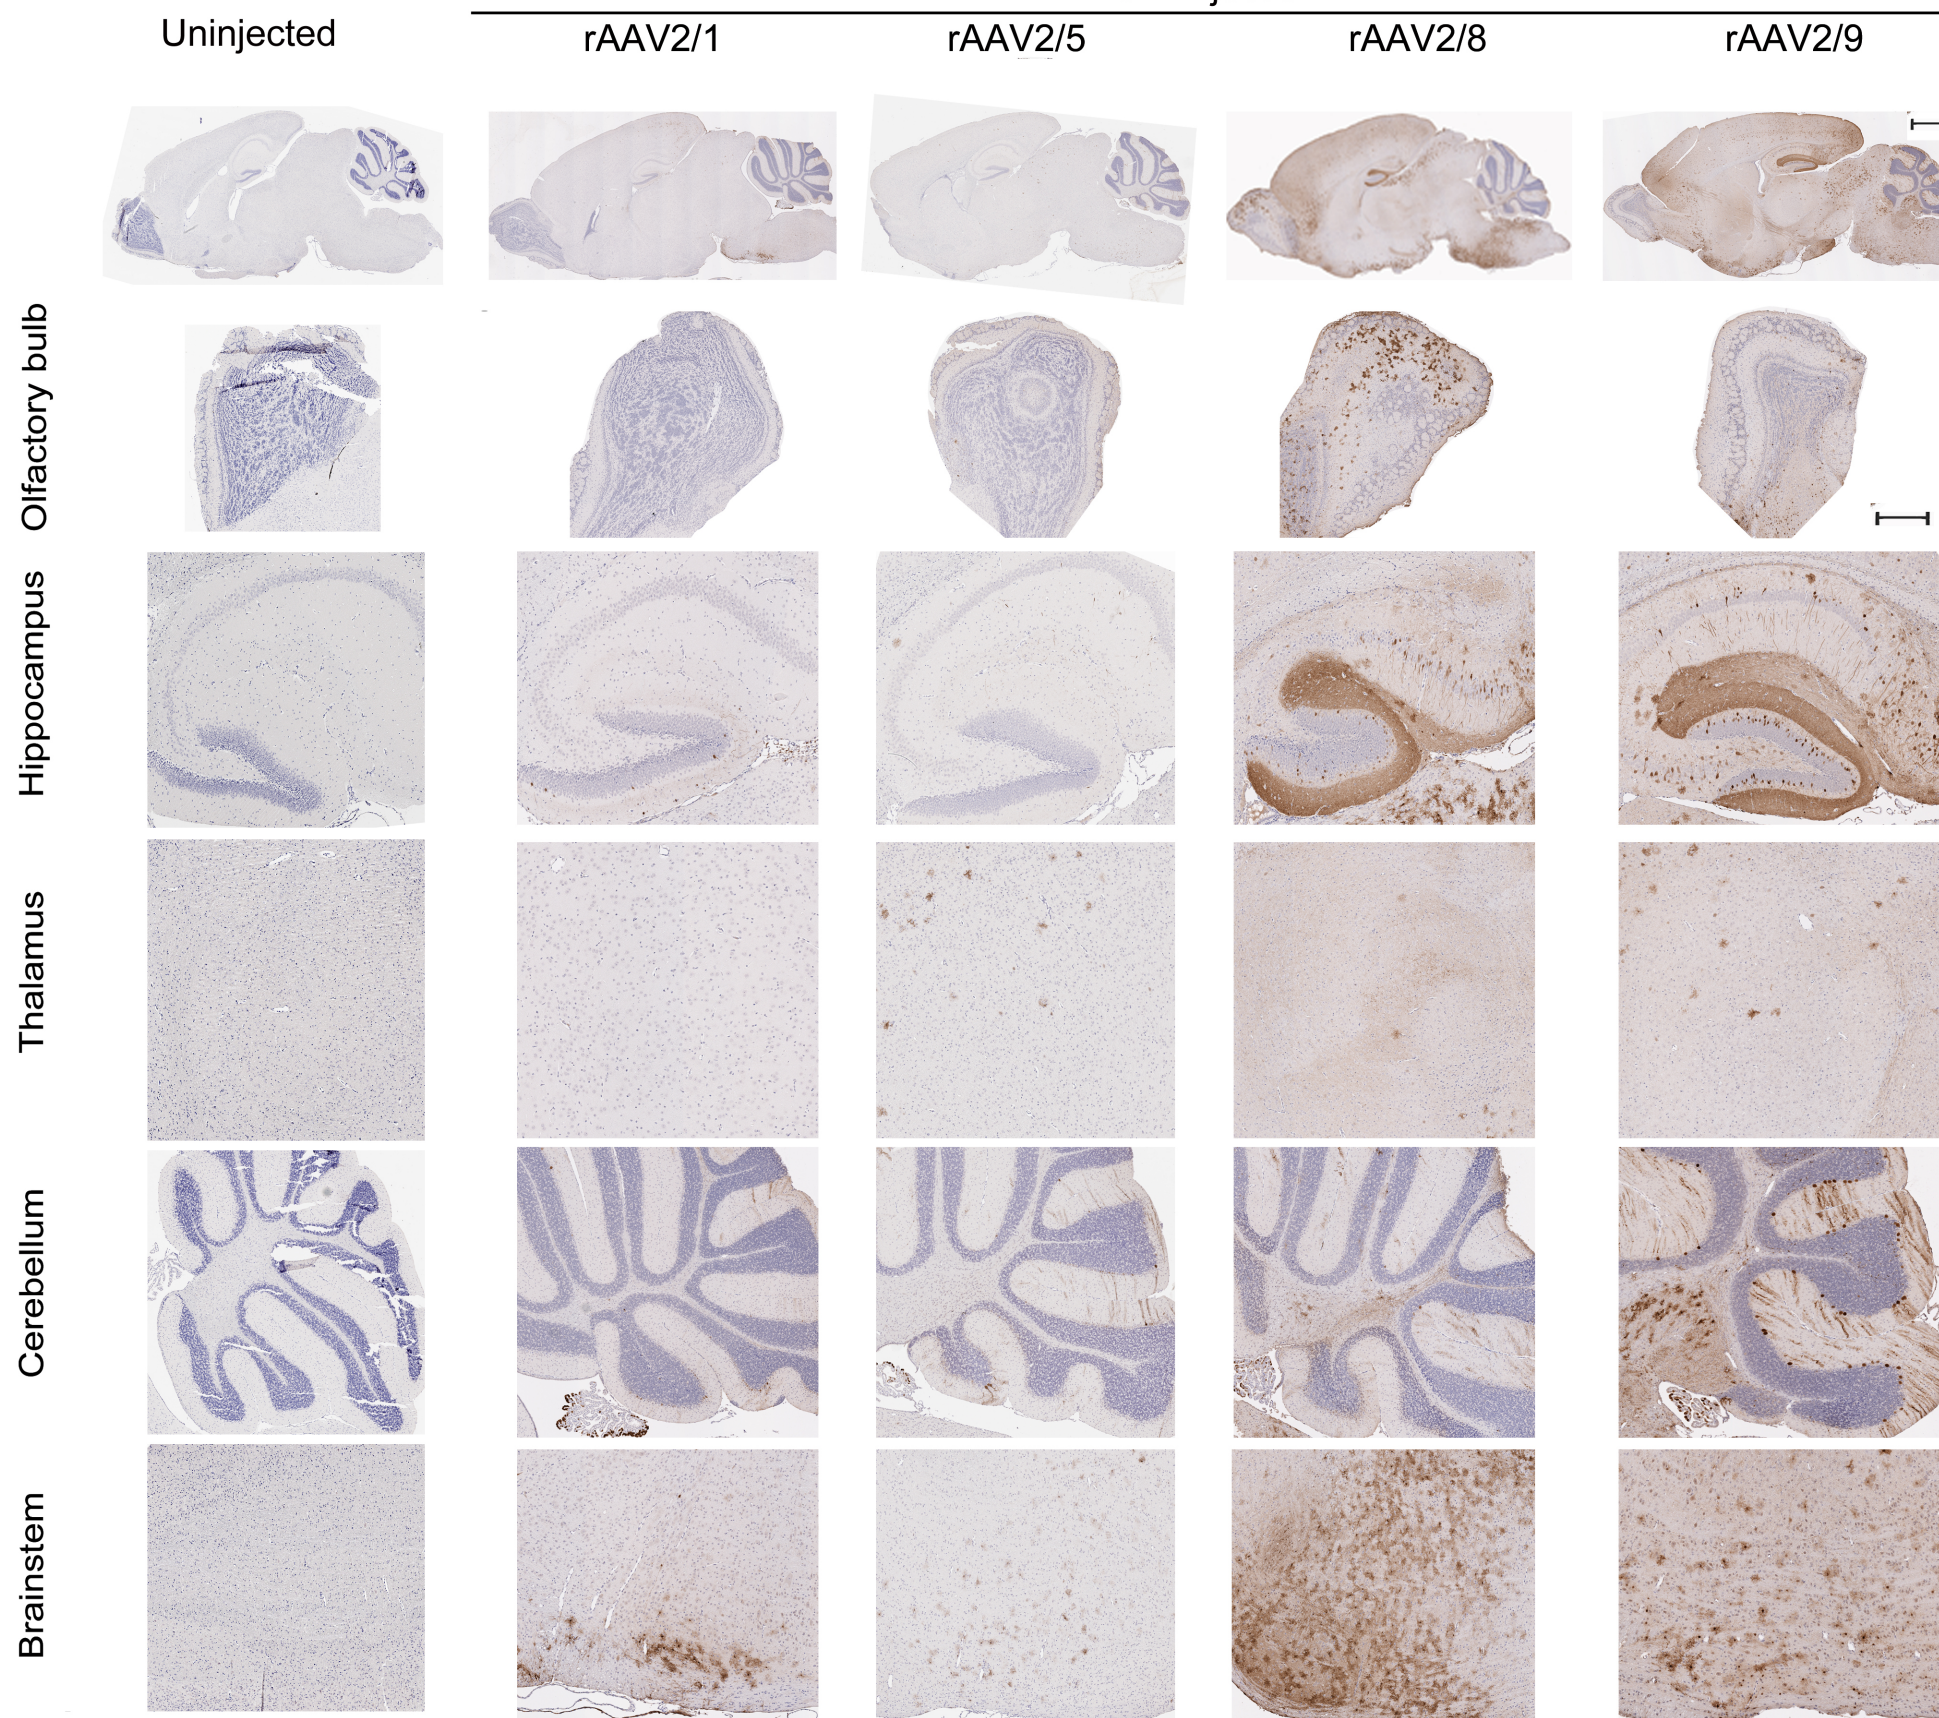

Supplemental Figure 5. EGFP expression in mice brains injected ICM with rAAV-EGFP on neonatal day P0. Representative sections from 3 week old mice show EGFP staining in different areas of the brain. Olf, olfactory bulb, hip, hippocampus, thal, thalamus, cereb, cerebellum, brainst, brain stem. For cortical distribution, please see Figure 4. Scale bar, top panel, 2mm; others, 500 $\mu$ m. n=3-4/group.



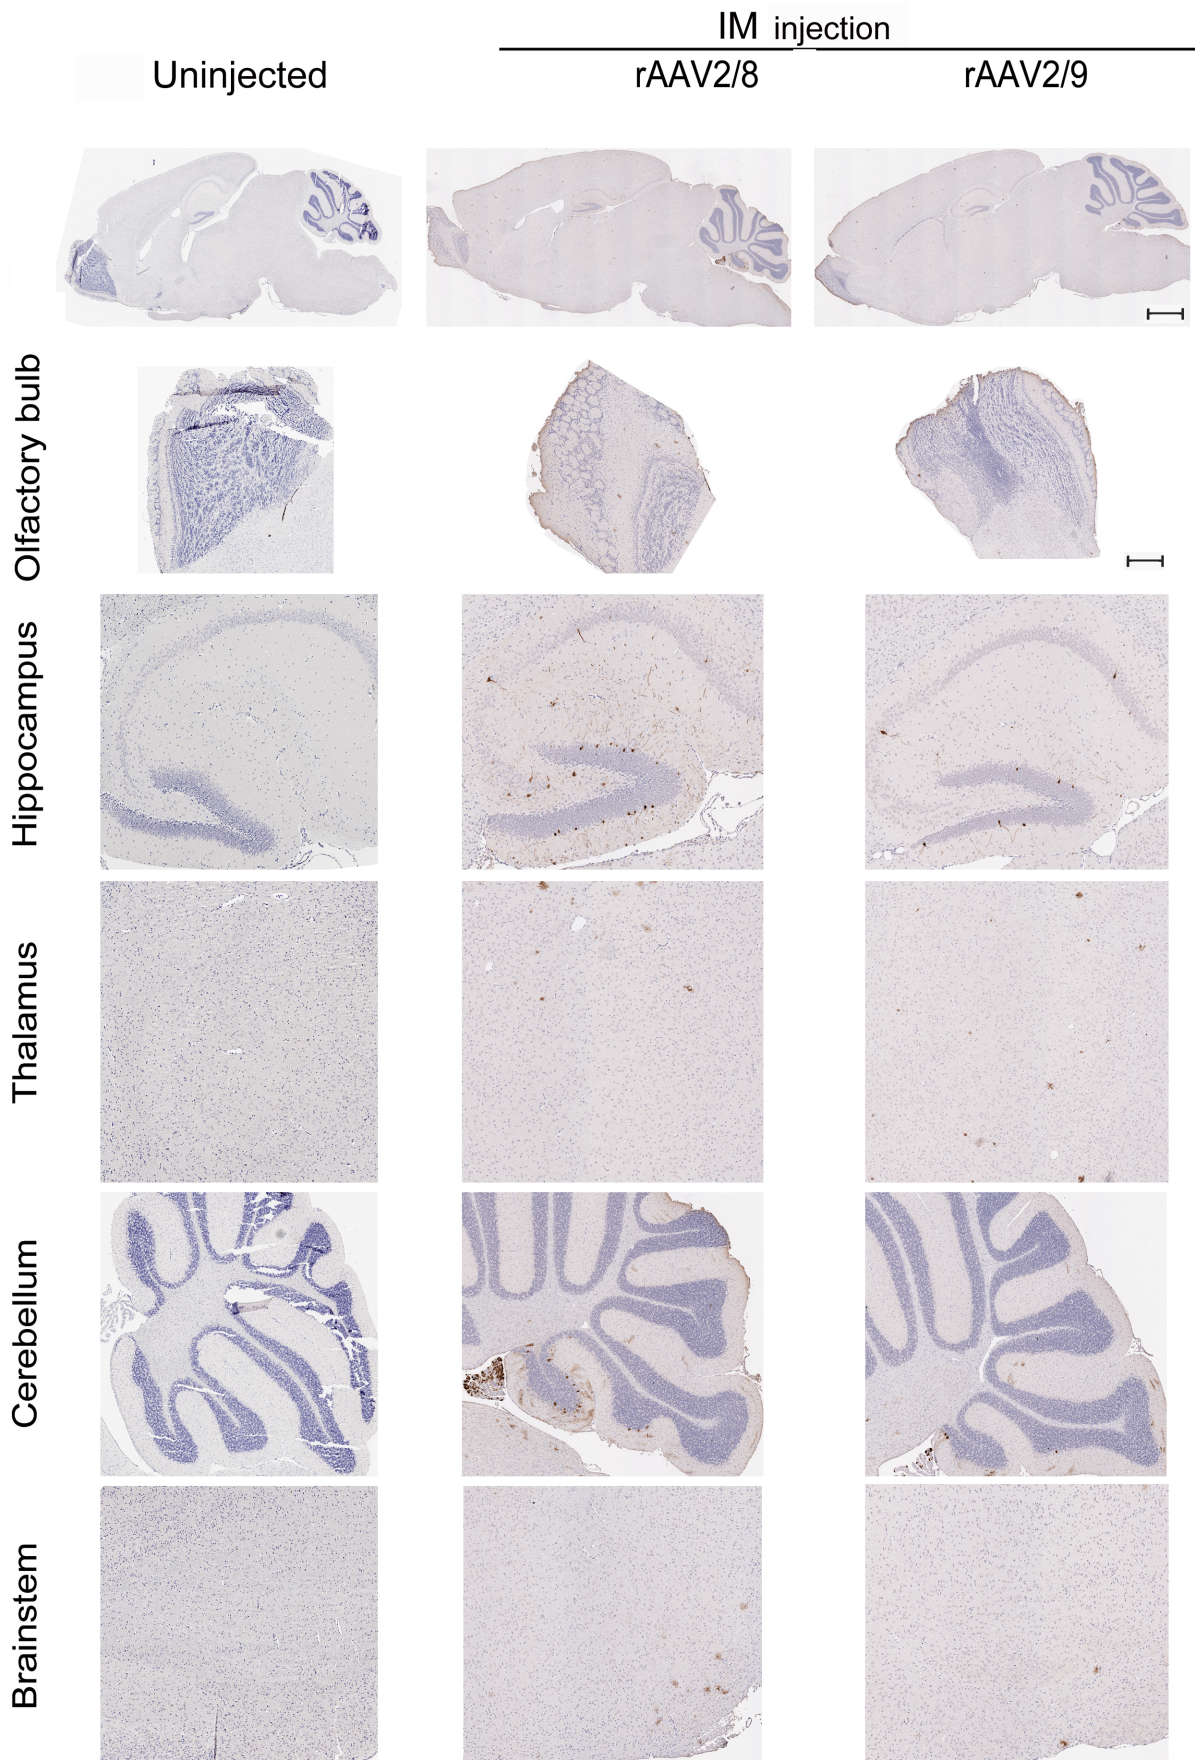

Supplemental Figure 6. EGFP expression in in mice brains injected with rAAV-EGFP in gastrocnemius muscle on neonatal day P0. Representative sections from 3 week old mice show EGFP staining in different areas of the brain. No expression was observed in any brain structure following IM injection of rAAV2/1 or 2/5 (data not shown), whereas 2/8 and 2/9 widespread but weak EGFP immunostaining. Olf, olfactory bulb, hip, hippocampus, thal, thalamus, cereb, cerebellum, brainst, brain



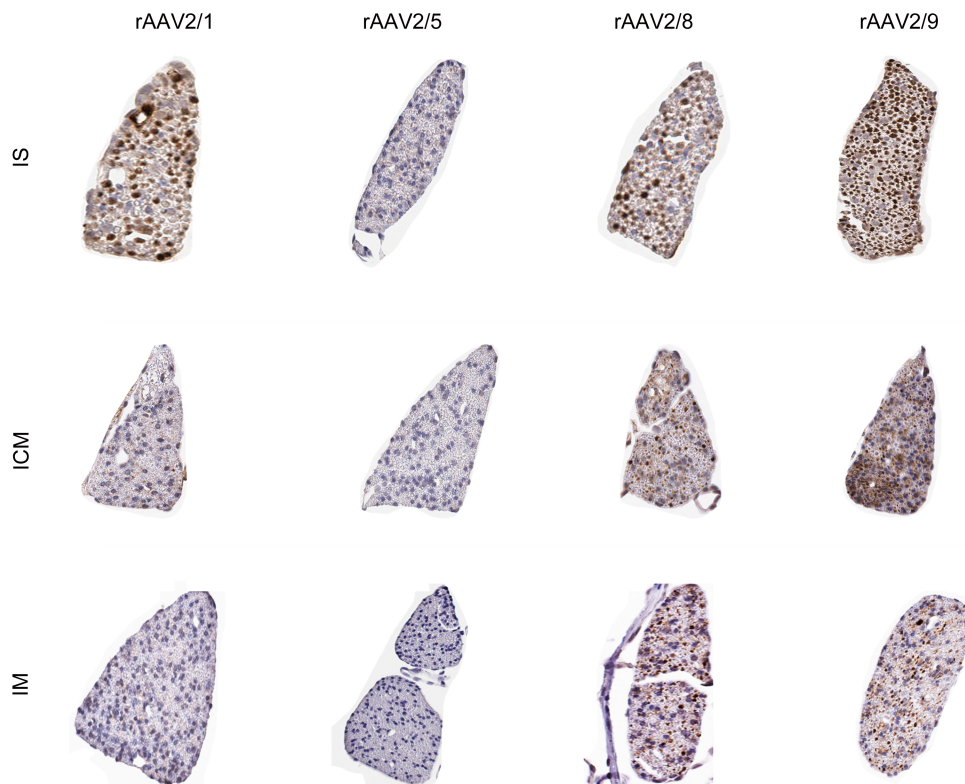

Supplemental Figure 7. EGFP expression in the DRG of mice injected with different rAAV serotypes via IM, ICM or IS routes on neonatal day P0. Representative DRGs from the lumbar spinal cord (IS and IM) or cervical spinal cord (ICM) are depicted following EGFP immunostaining. Scale bar, 120 $\mu$ m. n=3-4/group.
